# Supplementary material
Source: Springer Nature journal article supplement (https://www.springermedizin.de/resource/supplementary/12979_2013_177_MOESM6_ESM.pdf/9603166)

**A****CD4 T cells****CD8 T cells**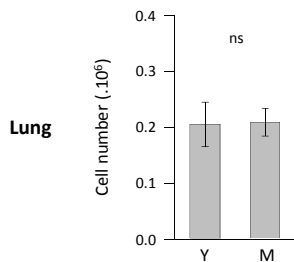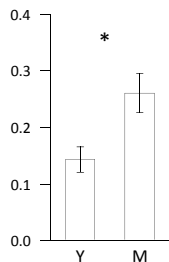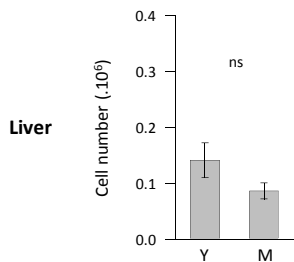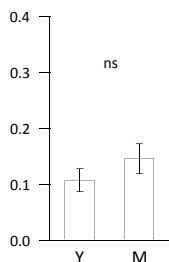**B****Thymocytes****Secondary lymphoid organs  
CD4 T cells****cLP  
CD4 T cells**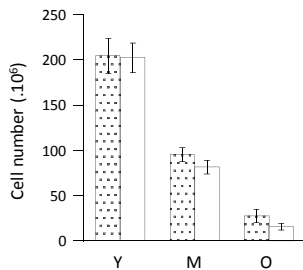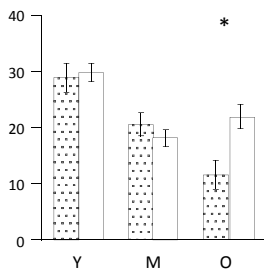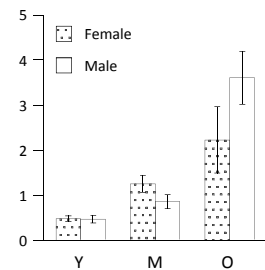

Supplement: MOESM6 [file 9603166]
